# Supplementary material for: Copper tetrathiovanadate (Cu3VS4): a newly emerging electrode for rechargeable aqueous aluminum-ion batteries
Source: Royal Society of Chemistry journal article supplement (doi:10.1039/d3dt02844e), 2023-12-21
Supplement: d3dt02844e1.pdf [file d3dt02844e1.pdf]

## Supporting information for

### Copper tetrathiovanadate ( $\text{Cu}_3\text{VS}_4$ ): a new emerging electrode for rechargeable aqueous aluminum-ion battery

Sunny Nandi<sup>a,b\*</sup>, Hirdoyjit Phukon<sup>c,d</sup>, Dipul Kalita<sup>d</sup>, Shyamal K. Das<sup>a</sup>

<sup>a</sup>Department of Physics, Tezpur University, Assam 784028, India

<sup>b</sup>New Technologies – Research Centre (NTC), University of West Bohemia, Pilsen 30100, Czech Republic

<sup>c</sup>Academy of Scientific and Innovative Research (AcSIR), Ghaziabad - 201002, India.

<sup>d</sup>Agro-technology and Rural Development Division (ARRD), North East Institute of Science and Technology, Jorhat-785006, Assam, India

#### Experimental details:

$\text{Cu}_3\text{VS}_4$  was prepared by a simple hydrothermal method, as reported in ref [6f]. Briefly, to describe, 1.39 g of vanadium acetylacetonate ( $\text{C}_{15}\text{H}_{21}\text{O}_6\text{V}$ ), 0.301 g thioacetamide ( $\text{CH}_3\text{CSNH}_2$ ), and 0.161 g copper nitrate trihydrate ( $\text{Cu}(\text{NO}_3)_2 \cdot 3\text{H}_2\text{O}$ ) were dissolved in 35 ml of methanol solution and stirred for 30 min to form a homogenous solution. The solution was then transferred to a Teflon-lined stainless-steel autoclave and heated at 160 °C for 12 hr and then allowed to cool naturally to room temperature. The final product was collected by centrifugation, and repeatedly washed with ethanol and deionized water for several times, and dried at 80 °C overnight.

Electrode slurry was prepared by mixing  $\text{Cu}_3\text{VS}_4$  powder, carbon black, and polyvinylidene fluoride in a weight ratio of 7:2:1 using N-methyl-2-pyrrolidone solvent. The slurry was cast on pristine graphite (breadth = 1.5 cm, length = 1 cm) and dried at 80 °C for 12 hr. For the electrochemical measurements, cyclic voltammetry (CV) and galvanostatic charge/discharge experiments were performed in a conventional three-electrode electrochemical glass cell where Pt electrode and Ag/AgCl electrode were used as the counter and reference electrodes, respectively. The used electrolyte were 1 M  $\text{AlCl}_3$ , 1 M  $\text{Al}(\text{ClO}_4)_3$ , 0.5 M  $\text{Al}_2(\text{SO}_4)_3$ , 1 M  $\text{Al}(\text{NO}_3)_3$  unless otherwise specially stated. The discharge/charge and CV experiments were performed in a voltage range of -0.8 to 1 V (vs. Ag/AgCl). Electrochemical

impedance spectra (EIS) were recorded in the frequency range of 1 mHz-200 kHz at 10 mV signal amplitude. All the electrochemical tests were performed at room temperature (25 °C).

The composition of the as-prepared samples was evaluated using powder X-ray diffraction (BRUKER AXS D8 FOCUS; Cu-K $\alpha$  radiation,  $\lambda = 1.5406 \text{ \AA}$ ). The morphology of the as-prepared samples was examined by field emission scanning electron microscope (FESEM, JEOL JSM 7200F). X-ray photoelectron spectroscopy (XPS, Thermo-Scientific ESCALAB Xi<sup>+</sup>) was used to analyze the chemical composition and valence states of the constituent elements.

## Supplementary figures

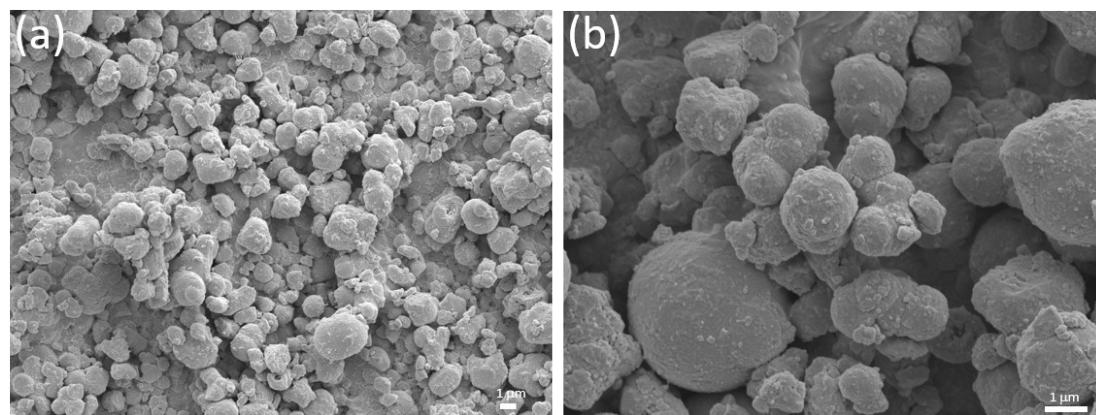

**Figure S1:** (a-b) FESEM images of  $\text{Cu}_3\text{VS}_4$ .

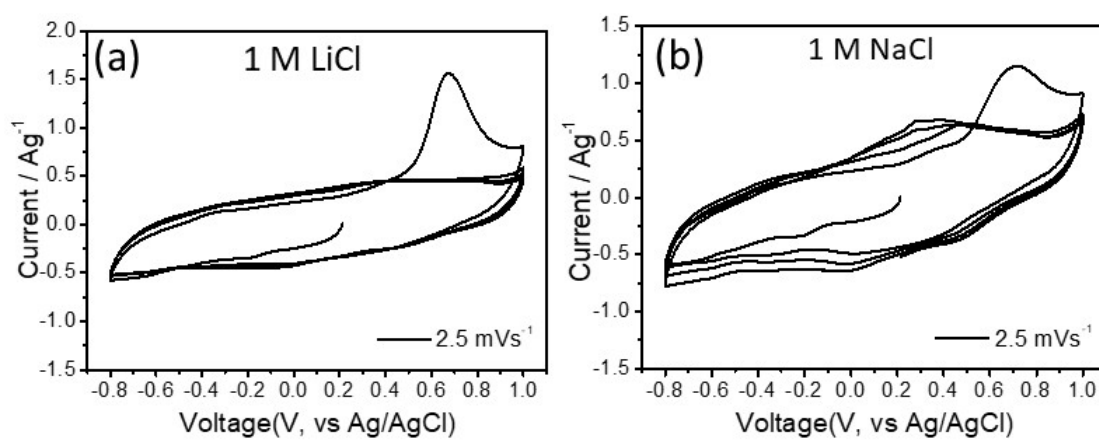

**Figure S2:** CV profiles of  $\text{Cu}_3\text{VS}_4$  in (a) 1 M LiCl and (b) 1 M NaCl aqueous electrolytes at a scan rate of  $2.5 \text{ mVs}^{-1}$ .

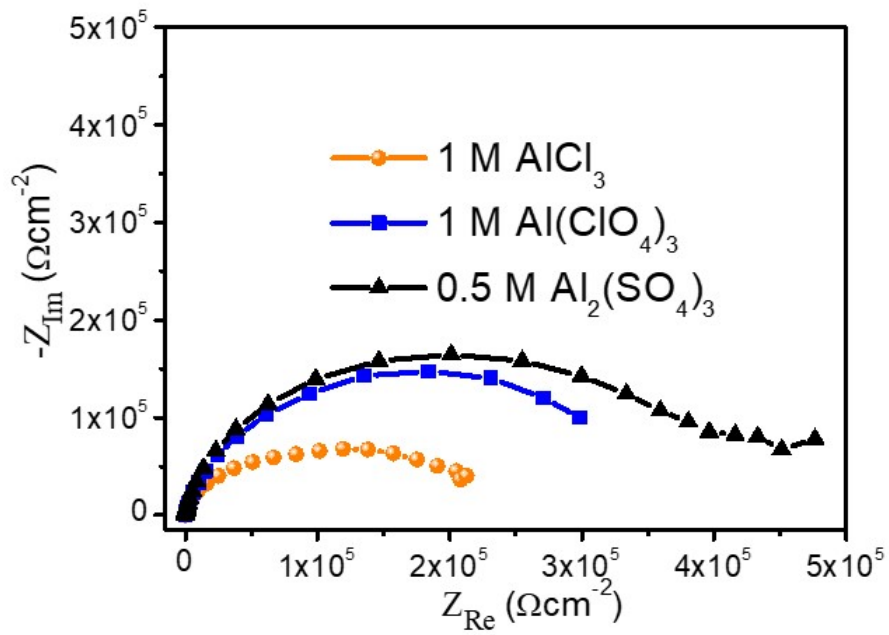

**Figure S3:** EIS spectra of  $\text{Cu}_3\text{VS}_4$  in three different aqueous electrolytes.

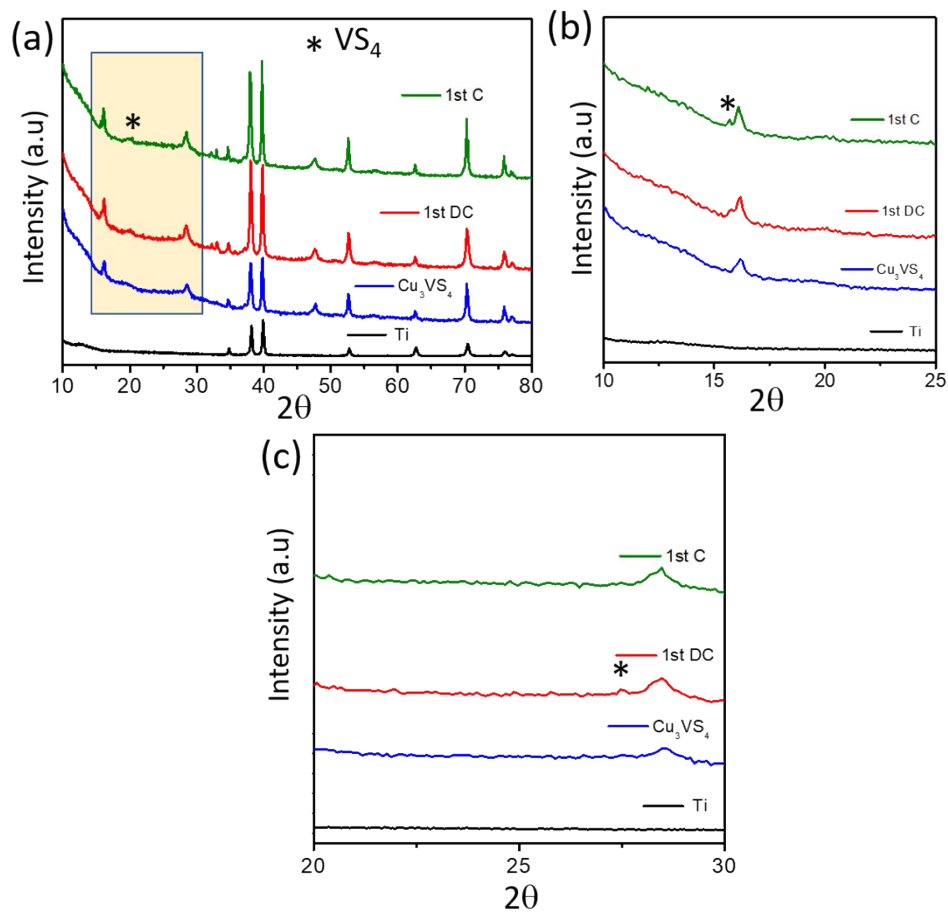

**Figure S4:** (a) Ex-situ XRD patterns of  $\text{Cu}_3\text{VS}_4$  before and after 1<sup>st</sup> discharge/1<sup>st</sup> charge state, and (b-c) enlargement of degree from 10° to 30° respectively.

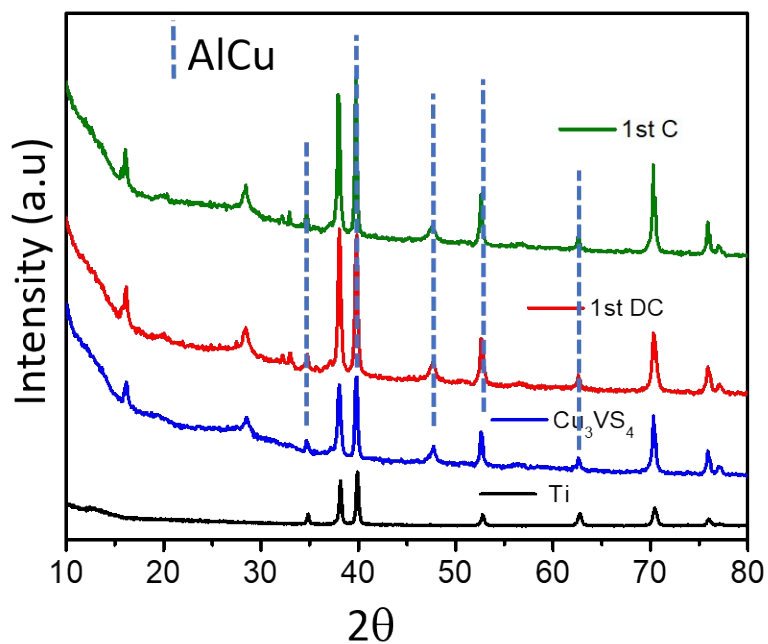

**Figure S5:** Ex-situ XRD patterns of  $\text{Cu}_3\text{VS}_4$  before and after 1<sup>st</sup> discharge/1<sup>st</sup> charge state. The dotted line indicates the AlCu peaks.

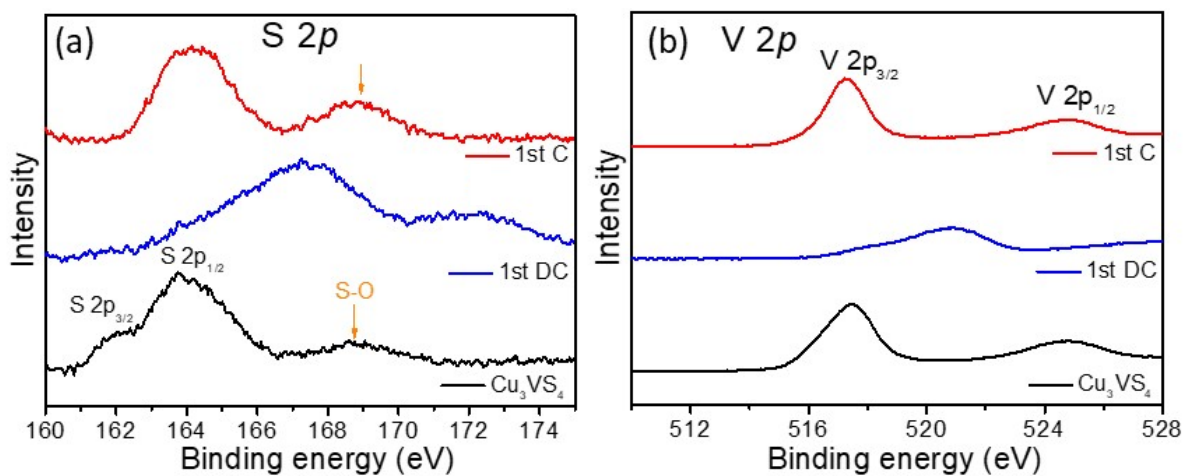

**Figure S6:** Ex-situ XPS spectra of (a) S 2p, and (b) V 2p before and after 1<sup>st</sup> discharge/1<sup>st</sup> charge states.

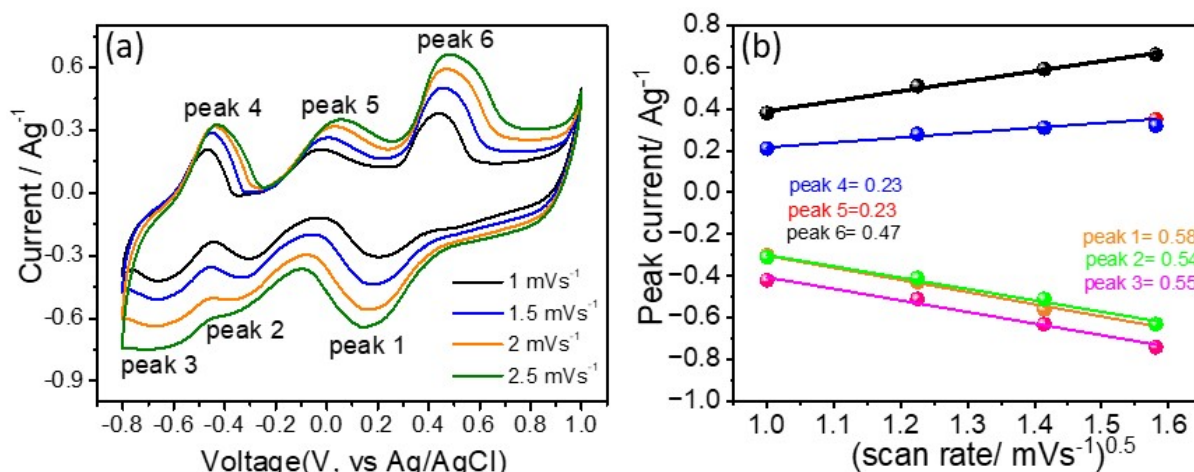

**Figure S7:** CV profiles of  $\text{Cu}_3\text{VS}_4$  at different scan rates in 1 M  $\text{AlCl}_3$  aqueous electrolyte, and (b) the corresponding linear dependence plots between peak current versus square root of scan rates using the equation  $I = k\gamma^{0.5}$  ( $k$  is a constant).

Table S1: The electrochemical performances of vanadium sulfides-based cathode materials

| Cathode materials                      | Discharge capacity                                                  | Cycle number | Type of electrolyte         | Reference        |
|----------------------------------------|---------------------------------------------------------------------|--------------|-----------------------------|------------------|
|                                        | (mAh g <sup>-1</sup> )<br>/current density<br>(mA g <sup>-1</sup> ) |              |                             |                  |
| G- $\text{VS}_2$                       | 50/100                                                              | 50           | Chloroaluminate electrolyte | S1               |
| $\text{VS}_4/\text{rGO}$               | 80/100                                                              | 100          | Chloroaluminate electrolyte | S2               |
| $\text{VS}_4$ nanowire                 | 129.24/400                                                          | 120          | Chloroaluminate electrolyte | S3               |
| Tremella $\text{VS}_4$                 | 322.2/200                                                           | 120          | Chloroaluminate electrolyte | S4               |
| Hierarchical $\text{VS}_2@\text{VS}_4$ | 116.5/300                                                           | 500          | Chloroaluminate electrolyte | S5               |
| $\text{Cu}_3\text{VS}_4$               | 77/2000                                                             | 300          | Aqueous electrolyte         | <b>This work</b> |

**Reference:**

- S1: L. Wu, R. Sun, F. Xiong, C. Pei, K. Han, C. Peng, Y. Fan, W. Yang, Q. An, L. Mai, *Phys. Chem. Chem. Phys.*, 2018, **20**, 22563-22568.
- S2: X. Zhang, S. Wang, J. Tu, G. Zhang, S. Li, D. Tian, S. Jiao, *ChemSusChem*, 2018, **11**, 709-715.
- S3: L. Xing, K. A. Owusu, X. Liu, J. Meng, K. Wang, Q. An, L. Mai, *Nano Energy*, 2021, **79**, 105384.
- S4: X. Han, F. Wu, R. Zhao, Y. Bai, C. Wu, *ACS Appl. Mater. Interfaces*, 2023, **15**, 6888–6901.
- S5: Y. Wang, Z. Shen, X. Lin, Q. Ding, X. Huang, T. Han, H. Zhang, J. Liu, *Chem. Commun.*, 2022, **58**, 11677-11680
